# Supplementary material
Source: PubMed Central journal article supplement (PMC5851138)
Supplement: JCB697988_supplementary_material.pdf [file JCB697988_supplementary_material.pdf]

**Supplementary Materials 1- Primers Sequence for Real-time PCR**

| Gene                             | Sequence(5,-3')                                                     | Accession number |
|----------------------------------|---------------------------------------------------------------------|------------------|
| <b>ChAT</b>                      | Forward: ACATGATCGAGCGCTGCAT<br>Reverse: CGAACTGCAGGGACTTGTCA       | NM_001170593.1   |
| <b>M<sub>1</sub></b>             | Forward: AACAGCTGGCCAAGAGAAAGAC<br>Reverse: CAGGAACACAGTCCTTGCAGAA  | NM_080773.1      |
| <b>M<sub>2</sub></b>             | Forward: TCAGCAATGCCTCCGTTATG<br>Reverse: CCCAGAGGATGAAGGAAAGGA     | NM_031016.1      |
| <b>M<sub>3</sub></b>             | Forward: GAGGAAGTACGGTCGCTGTCA<br>Reverse: TCTTCATCGGAGGAAGCAGAGT   | NM_012527.2      |
| <b>M<sub>4</sub></b>             | Forward: GCCATTGCTGCCTTCTACCT<br>Reverse: CAGAGGGCTCTTGAGGAAAGC     | NM_031547.1      |
| <b>M<sub>5</sub></b>             | Forward: TCCTCTGCTGGCAGTACTTGGT<br>Reverse: TCCGGCAGTAGAGTATGGTCATG | NM_017362.4      |
| <b><math>\alpha</math>7nAChR</b> | Forward: ATCATCGTGGCCTCTCTGT<br>Reverse: GTCCTCTCCGGGCCTCTTC        | NM_012832.3      |
| <b><math>\beta</math>-actin</b>  | Forward: CCTGTGGCATCCATGAAACTAC<br>Reverse: CCAGGGCAGTAATCTCCTTCTG  | NM_031144.3      |

**Supplementary Materials 2-Physiological parameters.**

| Parameters                  | Groups | Before EA  | During EA  | After reperfusion |
|-----------------------------|--------|------------|------------|-------------------|
| pH                          | NEA    | 7.40±0.02  | 7.39±0.02  | 7.39±0.01         |
|                             | EA     | 7.39±0.02  | 7.41±0.01  | 7.40±0.01         |
|                             | PD+EA  | 7.42±0.02  | 7.40±0.01  | 7.37±0.01         |
| PaCO <sub>2</sub><br>(mmHg) | NEA    | 25.1±1.9   | 27.6±2.2   | 25.8±2.4          |
|                             | EA     | 29.0±2.5   | 27.1±2.4   | 25.0±2.2          |
|                             | PD+EA  | 28.7±1.2   | 28.2±1.8   | 27.3±2.3          |
| PaO <sub>2</sub><br>(mmHg)  | NEA    | 265.9±29.3 | 214.2±28.2 | 246.9±34.9        |
|                             | EA     | 230.5±30.9 | 213.8±16.0 | 204.1±30.9        |
|                             | PD+EA  | 263.9±24.0 | 236.3±23.9 | 236.5±16.5        |
| MAP<br>(mmHg)               | NEA    | 95.8±1.7   | 94.3±1.7   | 94.0±1.4          |
|                             | EA     | 90.8±3.2   | 95.0±2.2   | 95.1±1.5          |
|                             | PD+EA  | 89.3±2.4   | 91.6±1.6   | 94.7±2.3          |

Data are presented as mean±SEM; n=10/group.
